# Supplementary material for: British Gynaecological Cancer Society Recommendations for Evidence Based, Population Data Derived Quality Performance Indicators for Ovarian Cancer
Source: MDPI journal article supplement (doi:10.3390/cancers15020337), 2023-01-04
Supplement: s1 [file s1]

# ROYAL MARSDEN HOSPITAL OVARIAN CANCER OPERATIVE REPORT

## 1. PATIENT INFORMATION

|              |         |               |         |                 |     |         |           |           |
|--------------|---------|---------------|---------|-----------------|-----|---------|-----------|-----------|
| Hospital no. |         | Date of birth |         | Date of Surgery |     | WHO PS  | Karnof PS | ASA grade |
| BMI          | Pre-Op: | Hb            | Albumin | Ca-125          | CEA | Ca-19,9 | Ca-15,3   | others    |

## 2. SURGERY DATA

|                          |            |                          |             |              |                        |              |                 |            |           |
|--------------------------|------------|--------------------------|-------------|--------------|------------------------|--------------|-----------------|------------|-----------|
| 1 <sup>st</sup> Surgeon: |            | 2 <sup>nd</sup> Surgeon: |             |              | Knife to skin (HH:mm): |              | Type of tumour: | Primary    | Recurrent |
| Aim of surgery (circle): | Diagnostic | Staging                  | Primary CRS | Interval CRS | Secondary CRS          | Tertiary CRS | Re-staging      | Palliative | Emergency |

| Suspected or Confirmed Diagnosis:            |     |    |                              |   |   | FIGO Stage (Table 1): |   |   |     |                           |   |   |
|----------------------------------------------|-----|----|------------------------------|---|---|-----------------------|---|---|-----|---------------------------|---|---|
| Suspected Stage IV?<br>(before chemotherapy) | Yes | No | Pleural effusion             | Y | N | Positive cytology     | Y | N | n/a | Pleural / lung parenchyma | Y | N |
|                                              |     |    | Liver parenchyma             | Y | N | Spleen parenchyma     | Y | N |     | Other (specify):          |   |   |
|                                              |     |    | Extra-abdominal lymph nodes? | Y | N | Location:             |   |   |     |                           |   |   |

## 3. SURGICAL APPROACH AND FINDINGS

|                                             |  |  |      |              |                                            |                             |      |            |         |
|---------------------------------------------|--|--|------|--------------|--------------------------------------------|-----------------------------|------|------------|---------|
| Previous gynaecological resection (circle): |  |  | Yes  | No           | If previous surgery, list organs resected: |                             |      |            |         |
| Approach (circle):                          |  |  | Open | Laparoscopic | Robotic                                    | Volume of Ascites (circle): | 0 mL | 1 – 500 mL | >500 mL |
| Intraoperative surgical spillage:           |  |  | Yes  | No           | Capsule rupture prior to surgery:          |                             |      | Yes        | No      |
| Frozen Section (circle):                    |  |  | Yes  | No           | Frozen Section Diagnosis:                  |                             |      |            |         |

Y=yes / N=no / U=unknown

### TUMOUR INVOLVEMENT

|                  |                  |                  |                 |                  |                   |                        |
|------------------|------------------|------------------|-----------------|------------------|-------------------|------------------------|
| Right ovary      | Vagina           | Pelvic sidewall  | Omentum         | Para-aortic LNs  | Lesser omentum    | Coeliac LNs            |
| Right tube       | Uterus           | Pelvic LNs       | Large bowel     | R diaphragm      | Stomach           | Abdominal wall         |
| Left ovary       | Bladder / ureter | R paracol gutter | Appendix        | L diaphragm      | Pancreas          | Skin                   |
| Left tube        | Sigmoid / rectum | L paracol gutter | Sm bowel mesen. | Liver surface    | Spleen            | Peri-cardiophrenic LNs |
| Pouch of Douglas | Recto-vag septum | Small bowel      | Lg bowel mesen. | Liver parenchyma | Hepatic hilum LNs | Inguinal LNs           |

### Peritoneal Cancer Index Scoring

Score each section 0-3 pre and postoperatively:

PRE POST

|                  |  |  |
|------------------|--|--|
| 0 Central        |  |  |
| 1 Right upper    |  |  |
| 2 Epigastrium    |  |  |
| 3 Left upper     |  |  |
| 4 Left flank     |  |  |
| 5 Left lower     |  |  |
| 6 Pelvis         |  |  |
| 7 Right lower    |  |  |
| 8 Right flank    |  |  |
| 9 Upper jejunum  |  |  |
| 10 Lower jejunum |  |  |
| 11 Upper ileum   |  |  |
| 12 Lower ileum   |  |  |
| PCI              |  |  |

### Anatomical Landmarks for Assessing Residual Retroperitoneal Disease

Tick all that apply:

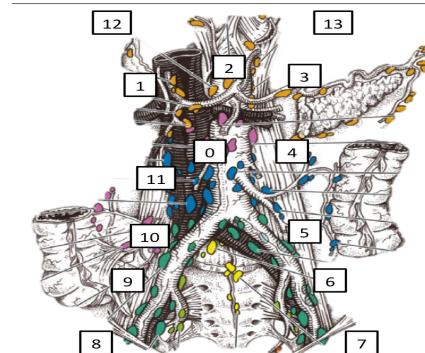

### RETROPERITONEAL DISEASE

|                           | + | R+ | RO |
|---------------------------|---|----|----|
| 0 Interaortocava/preaort. |   |    |    |
| 1 Porta Hepatis           |   |    |    |
| 2 Celiac Axis             |   |    |    |
| 3 Suprarenal/Splenic      |   |    |    |
| 4 Left aortic             |   |    |    |
| 5 Left common iliac       |   |    |    |
| 6 Left ext iliac          |   |    |    |
| 7 Left inguinal           |   |    |    |
| 8 Right inguinal          |   |    |    |
| 9 Right ext iliac         |   |    |    |
| 10 Right common iliac     |   |    |    |
| 11 Pre-Paracava           |   |    |    |
| 12 Right cardio phrenic   |   |    |    |
| 13 Left cardio phrenic    |   |    |    |

+: Suspicious or Positive  
R+: Residual disease  
RO: No residual disease

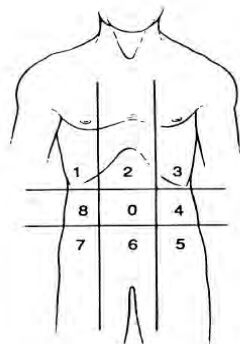

### PERITONEAL CANCER INDEX

#### Lesion Size Score

LS 0 No tumor seen  
LS 1 Tumor up to 0.5 cm  
LS 2 Tumor up to 5.0 cm  
LS 3 Tumor > 5.0 cm or confluence

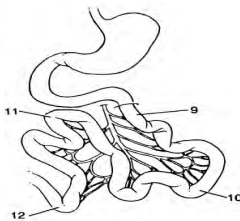

#### 4. SURGICAL PROCEDURES

Tick all that apply:

|                                                           |                                                             |                                                        |                                                              |
|-----------------------------------------------------------|-------------------------------------------------------------|--------------------------------------------------------|--------------------------------------------------------------|
| <input type="checkbox"/> Hysterectomy                     | <input type="checkbox"/> Pelvic lymphadenectomy             | <input type="checkbox"/> Resection of lesser omentum   | <input type="checkbox"/> Liver capsule resection             |
| <input type="checkbox"/> Unilateral salpingo-oophorectomy | <input type="checkbox"/> Peritonectomy of paracolic gutters | <input type="checkbox"/> Partial gastrectomy           | <input type="checkbox"/> Atypical liver resection (explain): |
| <input type="checkbox"/> Bilateral salpingo-oophorectomy  | <input type="checkbox"/> Para-aortic lymphadenectomy        | <input type="checkbox"/> Coeliac lymphadenectomy       | <input type="checkbox"/> Partial hepatectomy                 |
| <input type="checkbox"/> Small bowel mesentery            | <input type="checkbox"/> Small bowel resection              | <input type="checkbox"/> Hepatic hilum lymphadenectomy | <input type="checkbox"/> Cholecystectomy                     |
| <input type="checkbox"/> Ureteral resection               | <input type="checkbox"/> Large bowel resection              | <input type="checkbox"/> Diaphragmatic stripping       | <input type="checkbox"/> Morrison's Pouch peritonectomy      |
| <input type="checkbox"/> Colorectal resection             | <input type="checkbox"/> Appendicectomy                     | <input type="checkbox"/> Diaphragmatic resection       | <input type="checkbox"/> Inguinal lymphadenectomy            |
| <input type="checkbox"/> Partial cystectomy               | <input type="checkbox"/> Infracolic omentectomy             | <input type="checkbox"/> Splenectomy                   | <input type="checkbox"/> Peri-cardiophrenic lymphadenectomy  |
| <input type="checkbox"/> Pelvic peritonectomy             | <input type="checkbox"/> Radical omentectomy                | <input type="checkbox"/> Partial pancreatectomy        | <input type="checkbox"/> PlasmaJet                           |

|                     |   |   |   |   |   |                            |                  |     |    |             |            |           |     |
|---------------------|---|---|---|---|---|----------------------------|------------------|-----|----|-------------|------------|-----------|-----|
| Number Anastomoses: | 0 | 1 | 2 | 3 | 4 | Residual small bowel (cm): | Stoma Formation: | yes | no | Stoma Type: | Definitive | Temporary | N/A |
|---------------------|---|---|---|---|---|----------------------------|------------------|-----|----|-------------|------------|-----------|-----|

|                                                                                                                   |                |                |                          |                |      |       |      |
|-------------------------------------------------------------------------------------------------------------------|----------------|----------------|--------------------------|----------------|------|-------|------|
| Other procedures (circle):                                                                                        | IP-Port-a-cath | IV-Port-a-cath | Abdominal wall resection | Mesh placement | VATS | HIPEC | None |
| Further description of surgical procedures (eg: type of anastomoses, resection, stoma, indication for PlasmaJet): |                |                |                          |                |      |       |      |

#### 5. RESIDUAL DISEASE

|                                                        |                                                                                                                                                                                                                                                    |            |             |      |           |   |          |  |
|--------------------------------------------------------|----------------------------------------------------------------------------------------------------------------------------------------------------------------------------------------------------------------------------------------------------|------------|-------------|------|-----------|---|----------|--|
| Intra-abdominal (circle):                              | No macroscopic                                                                                                                                                                                                                                     | 0.1-0.59cm | 0.6-1.0cm   | >1cm |           |   |          |  |
| Extra-abdominal (circle):                              | No macroscopic                                                                                                                                                                                                                                     | 0.1-0.59cm | 0.6-1.0cm   | >1cm |           |   |          |  |
| Location (describe):                                   |                                                                                                                                                                                                                                                    |            |             |      |           |   |          |  |
| Reason(s) for no complete debulking: <i>*see below</i> | 1                                                                                                                                                                                                                                                  | 2          | 3           | 4    | 5         | 6 |          |  |
| Consultant second opinion sought? (circle):            | YES                                                                                                                                                                                                                                                |            | NO          |      |           |   |          |  |
| CC-score (completeness of cytoreduction):              | CC-0= no peritoneal nodule was seen<br>CC-1= nodules persisting after cytoreduction <2.5mm<br>CC-2= nodules between 2.5mm and 2.5cm<br>CC-3= nodules >2.5cm or a confluence of unresectable tumour nodule at any site within the abdomen or pelvis |            |             |      |           |   |          |  |
| GOG-score (max diameter of residual deposits):         | 1 = no macroscopic disease                                                                                                                                                                                                                         |            | 2 = 0.1-1cm |      | 3 = 1-2cm |   | 4 = >2cm |  |

#### 6. END OF OPERATION

|                              |                            |              |                            |
|------------------------------|----------------------------|--------------|----------------------------|
| Surgery finish time (HH:mm): | Estimated blood loss (mL): | Antibiotics: | Blood products transfused: |
|------------------------------|----------------------------|--------------|----------------------------|

|                                       |           |          |                   |                   |            |           |
|---------------------------------------|-----------|----------|-------------------|-------------------|------------|-----------|
| Intraoperative complications:         |           |          |                   |                   |            |           |
| Patient admitted to ITU with (circle) | Inotropes | NGT tube | Epidural Catheter | Endotracheal tube | Chest tube | Drain(s): |
| Free text comments:                   |           |          |                   |                   |            |           |

\* 1= diffuse deep infiltration of the root of small bowel mesentery, 2= diffuse carcinomatosis of the small bowel that requires resection leading to short bowel syndrome (<1.5m), 3= diffuse involvement / infiltration of stomach/duodenum, 4= diffuse involvement / deep infiltration of head or middle part of pancreas, 5= involvement of truncus coeliacus, hepatic arteries or left gastric artery, 6= non-resectable enlarged lymph nodes

**Table S1**  
2014 FIGO ovarian, fallopian tube, and peritoneal cancer staging system and corresponding TNM.

|           |                                                                                                                                                                                                                                                                                                                                                                                                                                |                                   |
|-----------|--------------------------------------------------------------------------------------------------------------------------------------------------------------------------------------------------------------------------------------------------------------------------------------------------------------------------------------------------------------------------------------------------------------------------------|-----------------------------------|
| I         | Tumor confined to ovaries or fallopian tube(s)                                                                                                                                                                                                                                                                                                                                                                                 | T1                                |
| IA        | Tumor limited to one ovary (capsule intact) or fallopian tube, No tumor on ovarian or fallopian tube surface No malignant cells in the ascites or peritoneal washings                                                                                                                                                                                                                                                          | T1a                               |
| IB        | Tumor limited to both ovaries (capsules intact) or fallopian tubes<br>No tumor on ovarian or fallopian tube surface<br>No malignant cells in the ascites or peritoneal washings                                                                                                                                                                                                                                                | T1b                               |
| IC        | Tumor limited to one or both ovaries or fallopian tubes, with any of the following:<br>IC1 Surgical spill intraoperatively<br>IC2 Capsule ruptured before surgery or tumor on ovarian or fallopian tube surface<br>IC3 Malignant cells present in the ascites or peritoneal washings                                                                                                                                           | T1c                               |
| II        | Tumor involves one or both ovaries or fallopian tubes with pelvic extension (below pelvic brim) or peritoneal cancer (Tp)                                                                                                                                                                                                                                                                                                      | T2                                |
| IIA       | Extension and/or implants on the uterus and/or fallopian tubes/and/or ovaries                                                                                                                                                                                                                                                                                                                                                  | T2a                               |
| IIB       | Extension to other pelvic intraperitoneal tissues                                                                                                                                                                                                                                                                                                                                                                              | T2b                               |
| III       | Tumor involves one or both ovaries, or fallopian tubes, or primary peritoneal cancer, with cytologically or histologically confirmed spread to the peritoneum outside the pelvis and/or metastasis to the retroperitoneal lymph nodes                                                                                                                                                                                          | T3                                |
| IIIA      | Metastasis to the retroperitoneal lymph nodes with or without microscopic peritoneal involvement beyond the pelvis                                                                                                                                                                                                                                                                                                             | T1,T2,T3aN1                       |
| IIIA1     | Positive retroperitoneal lymph nodes only (cytologically or histologically proven)                                                                                                                                                                                                                                                                                                                                             |                                   |
| IIIA1(i)  | Metastasis $\leq$ 10 mm in greatest dimension (note this is tumor dimension and not lymph node dimension)                                                                                                                                                                                                                                                                                                                      | T3a/T3aN1                         |
| IIIA1(ii) | Metastasis $>$ 10 mm in greatest dimension                                                                                                                                                                                                                                                                                                                                                                                     |                                   |
| IIIA 2    | Microscopic extrapelvic (above the pelvic brim) peritoneal involvement with or without positive retroperitoneal lymph nodes                                                                                                                                                                                                                                                                                                    | T3a/T3aN1                         |
| IIIB      | Macroscopic peritoneal metastases beyond the pelvic brim $\leq$ 2 cm in greatest dimension, with or without metastasis to the retroperitoneal lymph nodes                                                                                                                                                                                                                                                                      | T3b/T3bN1                         |
| III C     | Macroscopic peritoneal metastases beyond the pelvic brim $>$ 2 cm in greatest dimension, with or without metastases to the retroperitoneal nodes (Note 1)                                                                                                                                                                                                                                                                      | T3c/T3cN1                         |
| IV        | Distant metastasis excluding peritoneal metastases<br>Stage IV A: Pleural effusion with positive cytology<br>Stage IV B: Metastases to extra-abdominal organs (including inguinal lymph nodes and lymph nodes outside of abdominal cavity) (Note 2)<br>(Note 1: includes extension of tumor to capsule of liver and spleen without parenchymal involvement of either organ)<br>(Note 2: Parenchymal metastases are Stage IV B) | Any T, Any N,<br>M1<br>T3c/T3cN1) |

Notes:

1. Includes extension of tumor to capsule of liver and spleen without parenchymal involvement of either organ.
2. Parenchymal metastases are Stage IV B.
