# Supplementary material for: British Gynaecological Cancer Society Recommendations for Evidence Based, Population Data Derived Quality Performance Indicators for Ovarian Cancer
Source: MDPI journal article supplement (doi:10.3390/cancers15020337), 2023-01-04
Supplement: s1 [file s1]

|   |                                                                                                                                                                                                                                                                        |
|---|------------------------------------------------------------------------------------------------------------------------------------------------------------------------------------------------------------------------------------------------------------------------|
| 1 | One-stop diagnostic clinics where patients can receive expert ultrasound/ CT imaging/ image-guided biopsies to confirm malignancy and stratify to the appropriate pathways<br><br>Pathways for women at low risk for malignancy to be managed in a standardised manner |
| 2 | Facilitation of outpatient interventions to improve diagnostic pathways in patients presenting as emergencies: ascites pathway; image-guided biopsies; standards for ascites molecular testing; acute oncology assessments                                             |
| 3 | Interventions for standardisation of decision making or treatment: innovative frailty assessments/ standardisation of radiology reporting)                                                                                                                             |
| 4 | Improving culture around surgical expertise: standardization of operative notes; defining supportive care for high tumour burden patients undergoing extensive surgery; surgical mentorship schemes                                                                    |
| 5 | More complete and granular data to inform future iterations of audit (e.g. comparing local data from coding against national data, developing automated pipelines for local data)                                                                                      |
| 6 | Addressing equity of access for ethnic minority patients and those with higher levels of social deprivation to specialised care and genetic testing                                                                                                                    |
| 7 | Implementation of genetic testing, including tumour testing in referring hospitals (secondary care)                                                                                                                                                                    |

**Box S1 - Best practice recommendations to optimise clinical care in advanced ovarian cancer**
