# Supplementary material for: British Gynaecological Cancer Society Recommendations for Evidence Based, Population Data Derived Quality Performance Indicators for Ovarian Cancer
Source: MDPI journal article supplement (doi:10.3390/cancers15020337), 2023-01-04

Figure S1. Net survival rates of patients with ovarian, fallopian tube and primary peritoneal carcinomas -excluding borderline histologies (all stages) at 1- and 5-years post diagnosis, by Cancer Alliance (diagnoses 2013 to 2017)

From the National Ovarian Cancer Audit Feasibility Report <sup>13</sup>

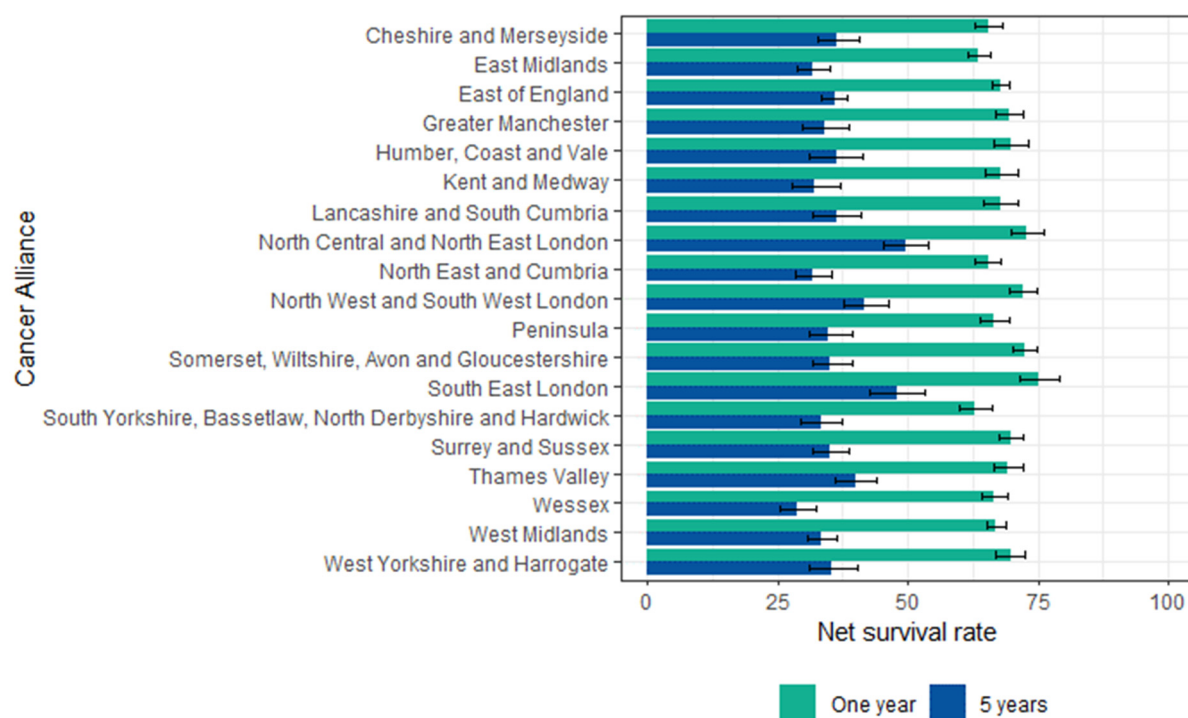

Supplement: s1 [file s1]
