# Supplementary material for: British Gynaecological Cancer Society Recommendations for Evidence Based, Population Data Derived Quality Performance Indicators for Ovarian Cancer
Source: MDPI journal article supplement (doi:10.3390/cancers15020337), 2023-01-04
Supplement: s1 [file s1]

|   |                                                                                                                                                                                                                                |
|---|--------------------------------------------------------------------------------------------------------------------------------------------------------------------------------------------------------------------------------|
| 1 | Definition of algorithms for patient-stratification to appropriate diagnostic and treatment pathway                                                                                                                            |
| 2 | Definition and validation of gynaecological oncology-specific frailty scores and complication scores                                                                                                                           |
| 3 | Linkage of socioeconomic data with genetic testing data and exploration of barriers to the broad implementation of genetic testing                                                                                             |
| 4 | Utilise the audit infrastructure to establish linked networks of tissue banks that can use routinely-collected data and outcomes for translational research as well as with prospectively assessed comprehensive clinical data |
| 5 | Define subgroup of patients who will not benefit from standard treatment approaches and need to be directed towards alternative treatment pathways at diagnosis                                                                |
| 6 | Health systems research to investigate effectiveness of supra-regional networks for ovarian cancer                                                                                                                             |

Box S3 - Priorities and key aspects for research
