# Supplementary material for: British Gynaecological Cancer Society Recommendations for Evidence Based, Population Data Derived Quality Performance Indicators for Ovarian Cancer
Source: Cancers (Basel). 2023 Jan 4;15(2):337. doi: 10.3390/cancers15020337 (PMC9856668; doi:10.3390/cancers15020337)
Supplement: Supplementary file 1 [file cancers-15-00337-s001.zip]

Archive with 5 entries (5 files):
- BGCS QPI Box1.pdf
- BGCS QPI Box2.pdf
- BGCS QPI Box3.pdf
- BGCS QPI Figure 1.pdf
- File S1. OVARIAN CA OP REPORT - Oct 2020[40].pdf
